# Supplementary material for: Towards Understanding the Chemical Structure Modification of EVA Copolymer upon MAPLE Processing of Thin Films
Source: MDPI journal article supplement (doi:10.3390/ijms222111686), 2021-10-28
Supplement: s1 [file s1]

# Towards Understanding the Chemical Structure Modification of EVA Copolymer upon MAPLE Processing of Thin Films

A quantitative statistical comparison of FTIR spectra was done basing on the Spencer et al. method [1] developed for absorbance comparison of FTIR spectra (specifically two bands).

The equation for an absorption band pair comparison:

$$\frac{A_{NS=1}(\nu_2)}{A_{NS=1}(\nu_1)} \pm \sigma_{\left[\frac{A_{NS=1}(\nu_2)}{A_{NS=1}(\nu_1)}\right]} \quad (1)$$

$$\sigma_{\left[\frac{A_{NS=1}(\nu_2)}{A_{NS=1}(\nu_1)}\right]} = \sqrt{N} \frac{A_{NS=1}(\nu_2)}{A_{NS=1}(\nu_1)} \times \left\{ \left[ \frac{1}{SNR_{NS=N}^A(\nu_2)} \right] \right\}^2 + \left\{ \left[ \frac{1}{SNR_{NS=N}^A(\nu_1)} \right] \right\}^2 \quad (2)$$

$$A_{NS=1}(\nu) = A_{NS=N}(\nu) \quad (3)$$

$$SNR_{NS=N}^A(\nu) = \frac{A_{NS=N}(\nu)}{\sigma_{NS=N}^A} \quad (4)$$

$A_{NS=1}(\nu)$ —single-scan absorbance spectrum

$A_{NS=N}(\nu)$ —a signal-averaged spectrum composed of N scans

$SNR_{NS=N}^A(\nu)$ —signal-to-noise ratio

NS—the number of signal-averaged scans in a spectrum

$\sigma_{NS=N}^A$ —average noise amplitude in an absorbance spectrum (determined from 1900–2000  $\text{cm}^{-1}$ )

|                        | $\nu$ | $A_{NS=N}(\nu)$ | $\sigma_{NS=N}^A$ | $SNR_{NS=N}^A(\nu)$ | $\frac{A_{NS=1}(\nu_2)}{A_{NS=1}(\nu_1)}$ | $\sigma_{\left[\frac{A_{NS=1}(\nu_2)}{A_{NS=1}(\nu_1)}\right]}$ |
|------------------------|-------|-----------------|-------------------|---------------------|-------------------------------------------|-----------------------------------------------------------------|
| EVA REF                | 2922  | 1.231           | 0.0004            | 2930.952            |                                           |                                                                 |
|                        | 1737  | 1.258           | 0.0004            | 2995.238            |                                           |                                                                 |
|                        |       |                 |                   |                     | 1.02                                      | 0.008                                                           |
|                        | 2922  | 1.231           | 0.0004            | 2930.952            |                                           |                                                                 |
|                        | 1240  | 1.093           | 0.0004            | 2602.381            |                                           |                                                                 |
|                        |       |                 |                   |                     | 0.89                                      | 0.007                                                           |
|                        | 2922  | 1.231           | 0.0004            | 2930.952            |                                           |                                                                 |
|                        | 1371  | 0.336           | 0.0004            | 800.000             |                                           |                                                                 |
|                        |       |                 |                   |                     | 0.27                                      | 0.006                                                           |
|                        | 2922  | 1.231           | 0.0004            | 2930.952            |                                           |                                                                 |
|                        | 1465  | 0.203           | 0.0004            | 483.333             |                                           |                                                                 |
|                        |       |                 |                   |                     | 0.16                                      | 0.006                                                           |
| 0.24 J/cm <sup>2</sup> | 2922  | 0.028           | 0.00322           | 8.696               |                                           |                                                                 |
|                        | 1737  | 0.029           | 0.00322           | 9.006               |                                           |                                                                 |
|                        |       |                 |                   |                     | 1.04                                      | 2.649                                                           |
|                        | 2922  | 0.028           | 0.00322           | 8.696               |                                           |                                                                 |
|                        | 1240  | 0.019           | 0.00322           | 5.901               |                                           |                                                                 |
|                        |       |                 |                   |                     | 0.68                                      | 2.224                                                           |
|                        | 2922  | 0.028           | 0.00322           | 8.696               |                                           |                                                                 |
|                        | 1371  | -               | 0.00322           | -                   |                                           |                                                                 |
|                        |       |                 |                   |                     | -                                         | -                                                               |

|                        |      |       |         |        |      |       |
|------------------------|------|-------|---------|--------|------|-------|
|                        | 2922 | 0.028 | 0.00322 | 8.696  |      |       |
|                        | 1465 | -     | 0.00322 | -      |      |       |
|                        |      |       |         |        | -    | -     |
| 0.35 J/cm <sup>2</sup> | 2922 | 0.147 | 0.00476 | 30.882 |      |       |
|                        | 1737 | 0.177 | 0.00476 | 37.185 |      |       |
|                        |      |       |         |        | 1.20 | 0.811 |
|                        | 2922 | 0.147 | 0.00476 | 30.882 |      |       |
|                        | 1240 | 0.127 | 0.00476 | 26.681 |      |       |
|                        |      |       |         |        | 0.86 | 0.685 |
|                        | 2922 | 0.147 | 0.00476 | 30.882 |      |       |
|                        | 1371 | 0.042 | 0.00476 | 8.823  |      |       |
|                        |      |       |         |        | 0.29 | 0.539 |
|                        | 2922 | 0.147 | 0.00476 | 30.882 |      |       |
|                        | 1465 | 0.034 | 0.00476 | 7.1429 |      |       |
|                        |      |       |         |        | 0.23 | 0.532 |
| 0.43 J/cm <sup>2</sup> | 2922 | 0.153 | 0.00262 | 58.397 |      |       |
|                        | 1737 | 0.18  | 0.00262 | 68.702 |      |       |
|                        |      |       |         |        | 1.18 | 0.423 |
|                        | 2922 | 0.153 | 0.00262 | 58.397 |      |       |
|                        | 1240 | 0.133 | 0.00262 | 50.763 |      |       |
|                        |      |       |         |        | 0.87 | 0.363 |
|                        | 2922 | 0.153 | 0.00262 | 58.397 |      |       |
|                        | 1371 | 0.04  | 0.00262 | 15.267 |      |       |
|                        |      |       |         |        | 0.26 | 0.283 |
|                        | 2922 | 0.153 | 0.00262 | 58.397 |      |       |
|                        | 1465 | 0.021 | 0.00262 | 8.0153 |      |       |
|                        |      |       |         |        | 0.14 | 0.277 |
| 0.50 J/cm <sup>2</sup> | 2922 | 0.147 | 0.00314 | 46.815 |      |       |
|                        | 1737 | 0.162 | 0.00314 | 51.592 |      |       |
|                        |      |       |         |        | 1.10 | 0.509 |
|                        | 2922 | 0.147 | 0.00314 | 46.815 |      |       |
|                        | 1240 | 0.125 | 0.00314 | 39.809 |      |       |
|                        |      |       |         |        | 0.85 | 0.449 |
|                        | 2922 | 0.147 | 0.00314 | 46.815 |      |       |
|                        | 1371 | 0.039 | 0.00314 | 12.420 |      |       |
|                        |      |       |         |        | 0.27 | 0.354 |
|                        | 2922 | 0.147 | 0.00314 | 46.815 |      |       |
|                        | 1465 | 0.028 | 0.00314 | 8.9172 |      |       |
|                        |      |       |         |        | 0.19 | 0.348 |

### One-way ANOVA of band at 1737 cm<sup>-1</sup>

|                                           |          |
|-------------------------------------------|----------|
| ANOVA summary                             |          |
| F                                         | 1.029    |
| P value                                   | 0.3912   |
| P value summary                           | ns       |
| Significant diff. among means (P < 0.05)? | No       |
| R squared                                 | 0.003217 |

#### 95% Confidence Intervals (Dunnett)

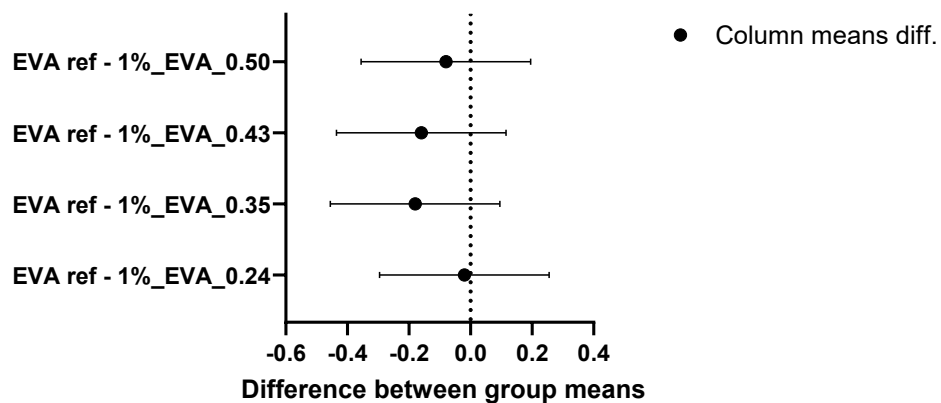

### One-way ANOVA of band at 1240 cm<sup>-1</sup>

|                                           |          |
|-------------------------------------------|----------|
| ANOVA summary                             |          |
| F                                         | 1.614    |
| P value                                   | 0.1682   |
| P value summary                           | ns       |
| Significant diff. among means (P < 0.05)? | No       |
| R squared                                 | 0.005039 |

#### 95% Confidence Intervals (Dunnett)

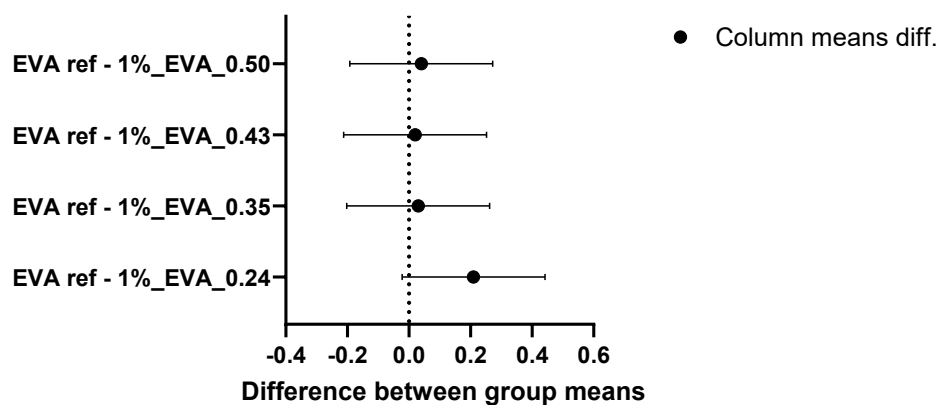

### One-way ANOVA of band at 1371 cm<sup>-1</sup>

| ANOVA summary                             |           |
|-------------------------------------------|-----------|
| F                                         | 0.3269    |
| P value                                   | 0.8059    |
| P value summary                           | ns        |
| Significant diff. among means (P < 0.05)? | No        |
| R squared                                 | 0.0009606 |

#### 95% Confidence Intervals (Dunnett)



### One-way ANOVA of band at 1465 cm<sup>-1</sup>

| ANOVA summary                             |          |
|-------------------------------------------|----------|
| F                                         | 3.265    |
| P value                                   | 0.0208   |
| P value summary                           | *        |
| Significant diff. among means (P < 0.05)? | Yes      |
| R squared                                 | 0.009512 |

#### 95% Confidence Intervals (Dunnett)

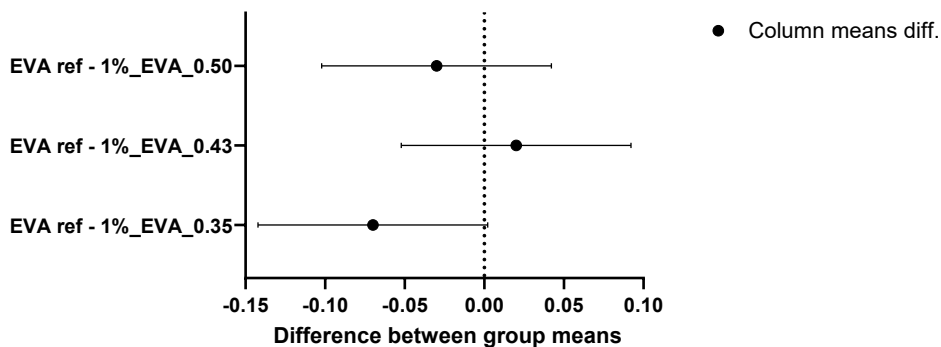

|               | $\nu$ | $A_{NS=N}(\nu)$ | $\sigma_{NS=N}^A$ | $SNR_{NS=N}^A(\nu)$ | $\frac{A_{NS=1}(\nu_2)}{A_{NS=1}(\nu_1)}$ | $\sigma_{\left[\frac{A_{NS=1}(\nu_2)}{A_{NS=1}(\nu_1)}\right]}$ |
|---------------|-------|-----------------|-------------------|---------------------|-------------------------------------------|-----------------------------------------------------------------|
| EVA REF       | 2922  | 1.231           | 0.00042           | 2930.952            |                                           |                                                                 |
|               | 1737  | 1.258           | 0.00042           | 2995.238            |                                           |                                                                 |
|               |       |                 |                   |                     | <b>1.02</b>                               | <b>0.008</b>                                                    |
|               | 2922  | 1.231           | 0.00042           | 2930.952            |                                           |                                                                 |
|               | 1240  | 1.093           | 0.00042           | 2602.381            |                                           |                                                                 |
|               |       |                 |                   |                     | <b>0.89</b>                               | <b>0.007</b>                                                    |
|               | 2922  | 1.231           | 0.00042           | 2930.952            |                                           |                                                                 |
|               | 1371  | 0.336           | 0.00042           | 800                 |                                           |                                                                 |
|               |       |                 |                   |                     | <b>0.27</b>                               | <b>0.006</b>                                                    |
|               | 2922  | 1.231           | 0.00042           | 2930.952            |                                           |                                                                 |
|               | 1465  | 0.203           | 0.00042           | 483.3333            |                                           |                                                                 |
|               |       |                 |                   |                     | <b>0.16</b>                               | <b>0.006</b>                                                    |
| 0.5%_EVA_0.50 | 2922  | 0.267           | 0.00056           | 476.7857            |                                           |                                                                 |
|               | 1737  | 0.303           | 0.00056           | 541.0714            |                                           |                                                                 |
|               |       |                 |                   |                     | <b>1.13</b>                               | <b>0.051</b>                                                    |
|               | 2922  | 0.267           | 0.00056           | 476.7857            |                                           |                                                                 |
|               | 1240  | 0.21            | 0.00056           | 375                 |                                           |                                                                 |
|               |       |                 |                   |                     | <b>0.79</b>                               | <b>0.043</b>                                                    |
|               | 2922  | 0.267           | 0.00056           | 476.7857            |                                           |                                                                 |
|               | 1371  | 0.08            | 0.00056           | 142.8571            |                                           |                                                                 |
|               |       |                 |                   |                     | <b>0.30</b>                               | <b>0.035</b>                                                    |
|               | 2922  | 0.267           | 0.00056           | 476.7857            |                                           |                                                                 |
|               | 1465  | 0.079           | 0.00056           | 141.0714            |                                           |                                                                 |
|               |       |                 |                   |                     | <b>0.30</b>                               | <b>0.035</b>                                                    |
| 1%_EVA_0.50 * | 2922  | 0.286           | 0.00248           | 115.3226            |                                           |                                                                 |
|               | 1737  | 0.313           | 0.00248           | 126.2097            |                                           |                                                                 |
|               |       |                 |                   |                     | <b>1.09</b>                               | <b>0.206</b>                                                    |
|               | 2922  | 0.286           | 0.00248           | 115.3226            |                                           |                                                                 |
|               | 1240  | 0.246           | 0.00248           | 99.19355            |                                           |                                                                 |
|               |       |                 |                   |                     | <b>0.86</b>                               | <b>0.183</b>                                                    |
|               | 2922  | 0.286           | 0.00248           | 115.3226            |                                           |                                                                 |
|               | 1371  | 0.077           | 0.00248           | 31.04839            |                                           |                                                                 |
|               |       |                 |                   |                     | <b>0.27</b>                               | <b>0.144</b>                                                    |
|               | 2922  | 0.286           | 0.00248           | 115.3226            |                                           |                                                                 |
|               | 1465  | 0.05            | 0.00248           | 20.16129            |                                           |                                                                 |
|               |       |                 |                   |                     | <b>0.17</b>                               | <b>0.141</b>                                                    |
| 2%_EVA_0.50   | 2922  | 0.238           | 0.0055            | 43.27273            |                                           |                                                                 |
|               | 1737  | 0.273           | 0.0055            | 49.63636            |                                           |                                                                 |
|               |       |                 |                   |                     | <b>1.15</b>                               | <b>0.563</b>                                                    |
|               | 2922  | 0.238           | 0.0055            | 43.27273            |                                           |                                                                 |
|               | 1240  | 0.208           | 0.0055            | 37.81818            |                                           |                                                                 |
|               |       |                 |                   |                     | <b>0.87</b>                               | <b>0.491</b>                                                    |
|               | 2922  | 0.238           | 0.0055            | 43.27273            |                                           |                                                                 |
|               | 1371  | 0.064           | 0.0055            | 11.63636            |                                           |                                                                 |
|               |       |                 |                   |                     | <b>0.27</b>                               | <b>0.383</b>                                                    |
|               | 2922  | 0.238           | 0.0055            | 43.27273            |                                           |                                                                 |
|               | 1465  | 0.05            | 0.0055            | 9.090909            |                                           |                                                                 |
|               |       |                 |                   |                     | <b>0.21</b>                               | <b>0.378</b>                                                    |
| 3%_EVA_0.50   | 2922  | 0.274           | 0.0035            | 78.28571            |                                           |                                                                 |

|  |                 |       |        |          |      |       |
|--|-----------------|-------|--------|----------|------|-------|
|  | 1737            | 0.289 | 0.0035 | 82.57143 |      |       |
|  |                 |       |        |          | 1.05 | 0.297 |
|  | 2922            | 0.274 | 0.0035 | 78.28571 |      |       |
|  | 1240            | 0.233 | 0.0035 | 66.57143 |      |       |
|  |                 |       |        |          | 0.85 | 0.268 |
|  | 2922            | 0.274 | 0.0035 | 78.28571 |      |       |
|  | 1371            | 0.078 | 0.0035 | 22.28571 |      |       |
|  |                 |       |        |          | 0.28 | 0.212 |
|  | 2922            | 0.274 | 0.0035 | 78.28571 |      |       |
|  | 1465            | 0.058 | 0.0035 | 16.57143 |      |       |
|  | <b><i>v</i></b> |       |        |          | 0.21 | 0.209 |

#### One-way ANOVA of band at 1737 cm<sup>-1</sup>

|                                           |         |
|-------------------------------------------|---------|
| ANOVA summary                             |         |
| F                                         | 8.301   |
| P value                                   | <0.0001 |
| P value summary                           | ****    |
| Significant diff. among means (P < 0.05)? | Yes     |
| R squared                                 | 0.02538 |

#### 95% Confidence Intervals (Dunnett)

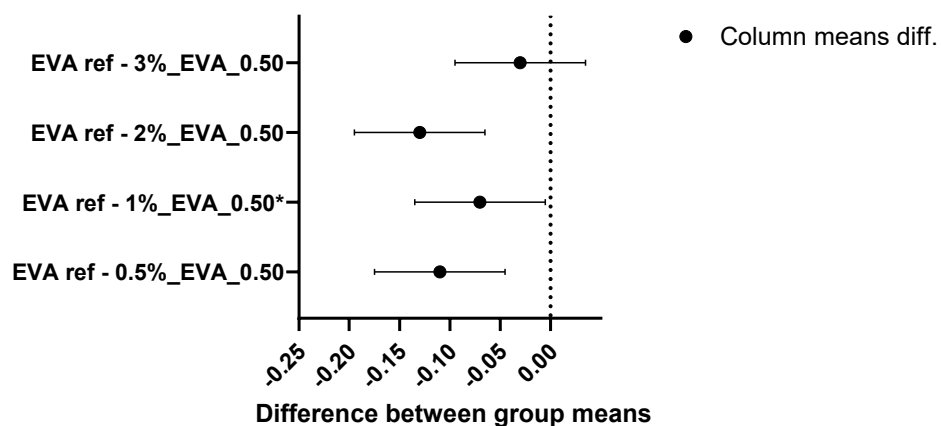

#### One-way ANOVA of band at 1240 cm<sup>-1</sup>

|                                           |         |
|-------------------------------------------|---------|
| ANOVA summary                             |         |
| F                                         | 5.219   |
| P value                                   | 0.0004  |
| P value summary                           | ***     |
| Significant diff. among means (P < 0.05)? | Yes     |
| R squared                                 | 0.01611 |

### 95% Confidence Intervals (Dunnett)

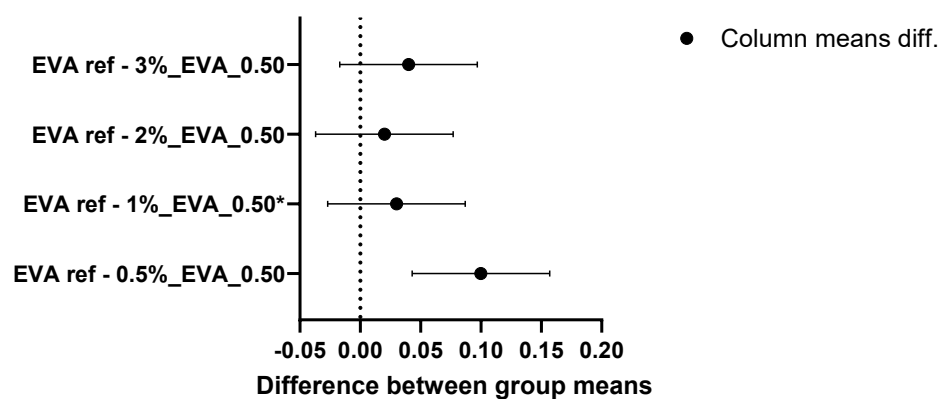

### One-way ANOVA of band at 1371 cm<sup>-1</sup>

|                                           |          |
|-------------------------------------------|----------|
| ANOVA summary                             |          |
| F                                         | 1.019    |
| P value                                   | 0.3965   |
| P value summary                           | ns       |
| Significant diff. among means (P < 0.05)? | No       |
| R squared                                 | 0.003185 |

### 95% Confidence Intervals (Dunnett)

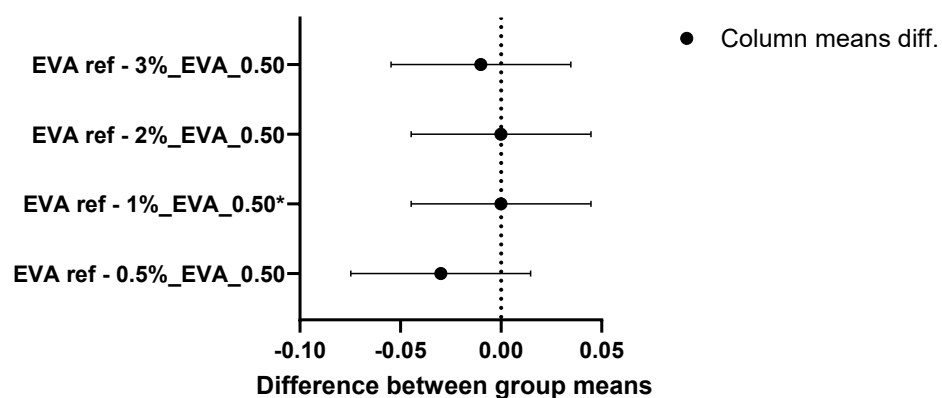

### One-way ANOVA of band at 1465 cm<sup>-1</sup>

|                                           |         |
|-------------------------------------------|---------|
| ANOVA summary                             |         |
| F                                         | 18.80   |
| P value                                   | <0.0001 |
| P value summary                           | ****    |
| Significant diff. among means (P < 0.05)? | Yes     |
| R squared                                 | 0.05568 |

### 95% Confidence Intervals (Dunnett)

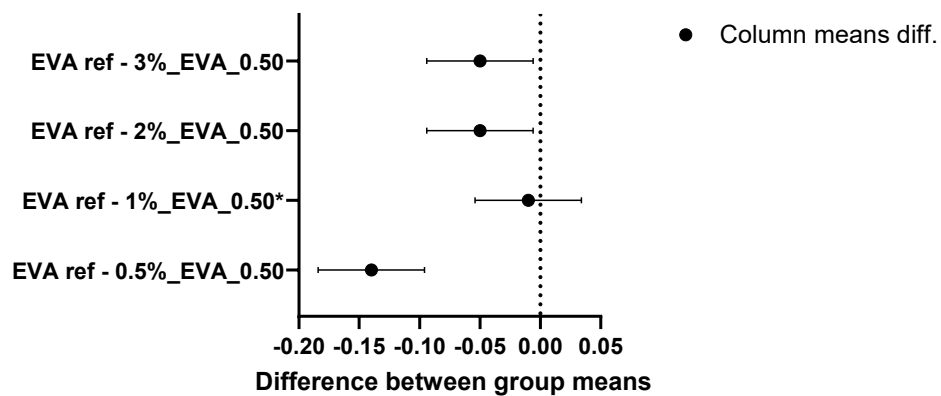

### Reference

1. Spencer, R.G.; Calton, E.F.; Pleshko Camacho, N. Statistical comparison of Fourier transform infrared spectra. *J. Biomed. Opt.* **2006**, *11*, 064023, doi:10.1117/1.2393231.
